# Supplementary material for: Dietary Cocoa Powder Improves Hyperlipidemia and Reduces Atherosclerosis in apoE Deficient Mice through the Inhibition of Hepatic Endoplasmic Reticulum Stress
Source: Hindawi journal article supplement (doi:10.1155/2016/1937572), 2016-01-01
Supplement: f1 [file 1937572.f1.pdf]

1   **Appendices**

2   Supplementary Table 1. Compositions of crude cocoa powder

| <b>Content (mg/g)</b> |      |
|-----------------------|------|
| Macronutrient         |      |
| Total fat             | 100  |
| Total carbohydrate    | 600  |
| Total protein         | 200  |
| Polyphenol            |      |
| Total monomers        | 71.0 |
| Epicatechin           | 4.6  |
| Catechin              | 2.2  |
| Proanthocyanidins     |      |
| Dimer                 | 3.3  |
| Trimer                | 3.1  |
| Tetramer              | 3.8  |
| Pentamer              | 3.2  |
| Hexamer               | 2.7  |
| Heptamer              | 2.2  |
| Octamer               | 2.6  |
| Nonamer               | 1.5  |
| Decamer               | 1.7  |

3   Foot note: Provided by China General Technology Holding Company.

4

1 Supplementary Table 2. Compositions of mouse Western diet

| <b>Nutrient</b>       | <b>Composition (%)</b> |
|-----------------------|------------------------|
| Basal mouse feed      | 78.98                  |
| Lard                  | 21                     |
| cholesterol           | 0.15                   |
| Energy (kcal/kg)      | 4510                   |
| <b>Ingredient (%)</b> |                        |
| Protein               | 15.8                   |
| Fat                   | 24.13                  |
| Fiber                 | 1.96                   |
| Crude ash             | 2.09                   |
| Carbohydrate          | 42.65                  |
| Calcium               | 0.9                    |
| Phosphorus            | 0.69                   |
| Lysine                | 0.67                   |
| Methionine            | 0.48                   |
| Arginine              | 0.67                   |
| Histidine             | 0.34                   |
| Tryptophan            | 0.14                   |
| Phenyl C              | 1.09                   |
| Threonine             | 0.49                   |
| Leucine               | 1.14                   |
| Isoleucine            | 0.53                   |
| Valine                | 0.62                   |
| Magnesium             | 0.16                   |
| Potassium             | 0.51                   |
| Sodium                | 0.19                   |

2 Foot note: Provided by Vital River Company

1 Supplementary Table 3. PCR array results of aortas

| Description                                                | Fold change | P- value(n=3) |
|------------------------------------------------------------|-------------|---------------|
| Selectin, endothelial cell                                 | -3.6217     | 0.132443      |
| Lipoprotein lipase                                         | -3.4742     | 0.015573      |
| Peroxisome proliferator activated receptor gamma           | -3.4263     | 0.02259       |
| Matrix metalloproteinase 1a (interstitial collagenase)     | -3.4027     | 0.088007      |
| B-cell leukemia/lymphoma 2 related protein A1a             | -2.8613     | 0.036411      |
| Fatty acid binding protein 3, muscle and heart             | -2.4794     | 0.007841      |
| Kinase insert domain protein receptor                      | -2.4284     | 0.119178      |
| Perilipin 2                                                | -2.3295     | 0.003315      |
| Interleukin 1 alpha                                        | -2.308      | 0.012445      |
| Nuclear factor of kappa light polypeptide gene enhancer in | -2.2294     | 0.597388      |
| Macrophage scavenger receptor 1                            | -2.2191     | 0.171391      |
| Integrin alpha X                                           | -2.214      | 0.272649      |
| Chemokine (C-C motif) ligand 5                             | -1.977      | 0.515914      |
| Fas (TNF receptor superfamily member 6)                    | -1.977      | 0.015324      |
| Nuclear receptor subfamily 1, group H, member 3            | -1.977      | 0.043186      |
| Selectin, platelet                                         | -1.9543     | 0.047703      |
| Chemokine (C-C motif) receptor 2                           | -1.8747     | 0.302899      |
| Prostaglandin-endoperoxide synthase 1                      | -1.8618     | 0.184362      |
| Cadherin 5                                                 | -1.7901     | 0.046128      |
| Integrin alpha 2                                           | -1.6974     | 0.156945      |
| Chemokine (C-C motif) receptor 1                           | -1.6663     | 0.350763      |
| ATP-binding cassette, sub-family A (ABC1), member 1        | -1.6472     | 0.161991      |
| Tumor necrosis factor, alpha-induced protein 3             | -1.6208     | 0.310106      |
| Lysophospholipase 1                                        | -1.6133     | 0.121042      |
| Apolipoprotein A-I                                         | -1.5984     | 0.272968      |
| Integrin beta 2                                            | -1.5911     | 0.210166      |
| Apolipoprotein E                                           | -1.5801     | 0.521446      |
| Leukemia inhibitory factor                                 | -1.5801     | 0.073135      |
| Secreted phosphoprotein 1                                  | -1.5404     | 0.261536      |
| Interleukin 1 receptor, type II                            | -1.5263     | 0.484753      |
| Tumor necrosis factor                                      | -1.5227     | 0.511643      |
| Chemokine (C-C motif) ligand 2                             | -1.5192     | 0.489232      |
| Apolipoprotein B                                           | -1.4406     | 0.145734      |
| Colony stimulating factor 2 (granulocyte-macrophage)       | -1.4406     | 0.145734      |
| Fibrinogen alpha chain                                     | -1.4406     | 0.145734      |
| Fibrinogen beta chain                                      | -1.4406     | 0.145734      |

|                                                            |         |          |
|------------------------------------------------------------|---------|----------|
| Interferon gamma                                           | -1.4406 | 0.145734 |
| Interleukin 2                                              | -1.4406 | 0.145734 |
| Interleukin 3                                              | -1.4406 | 0.145734 |
| Interleukin 5                                              | -1.4406 | 0.145734 |
| Laminin, alpha 1                                           | -1.4406 | 0.145734 |
| Thrombospondin 4                                           | -1.4406 | 0.145734 |
| Retinoid X receptor alpha                                  | -1.4373 | 0.558118 |
| Vascular endothelial growth factor A                       | -1.4306 | 0.444496 |
| Superoxide dismutase 1, soluble                            | -1.4077 | 0.058907 |
| Elastin                                                    | -1.4044 | 0.393012 |
| Transforming growth factor, beta 2                         | -1.4012 | 0.649983 |
| Matrix metalloproteinase 3                                 | -1.3692 | 0.284797 |
| Interleukin 4                                              | -1.3629 | 0.386151 |
| CASP8 and FADD-like apoptosis regulator                    | -1.2628 | 0.238132 |
| Transforming growth factor, beta 1                         | -1.2599 | 0.219367 |
| BH3 interacting domain death agonist                       | -1.2368 | 0.721725 |
| Peroxisome proliferator activated receptor alpha           | -1.1975 | 0.747026 |
| CD44 antigen                                               | -1.1408 | 0.559023 |
| Intercellular adhesion molecule 1                          | -1.1408 | 0.829335 |
| Bcl2-like 1                                                | -1.107  | 0.439555 |
| Vascular cell adhesion molecule 1                          | -1.0968 | 0.873811 |
| Collagen, type III, alpha 1                                | -1.0943 | 0.467957 |
| Angiotensin I converting enzyme (peptidyl-dipeptidase A) 1 | -1.0743 | 0.80899  |
| Chemokine (C-X-C motif) ligand 1                           | -1.0473 | 0.671943 |
| Fibroblast growth factor 2                                 | -1.007  | 0.894246 |
| Actin, beta                                                | 1       | 0        |
| Connective tissue growth factor                            | 1.0401  | 0.982886 |
| Endoglin                                                   | 1.0595  | 0.911608 |
| Selectin, platelet (p-selectin) ligand                     | 1.0595  | 0.777916 |
| Heparin-binding EGF-like growth factor                     | 1.0792  | 0.767953 |
| Integrin alpha 5 (fibronectin receptor alpha)              | 1.0943  | 0.851573 |
| Interleukin 1 beta                                         | 1.0994  | 0.922189 |
| Neuropeptide Y                                             | 1.1173  | 0.622566 |
| Peroxisome proliferator activator receptor delta           | 1.1303  | 0.734718 |
| Platelet derived growth factor receptor, beta polypeptide  | 1.1892  | 0.27901  |
| Selectin, lymphocyte                                       | 1.1892  | 0.424324 |
| Low density lipoprotein receptor                           | 1.192   | 0.371272 |
| Platelet derived growth factor, alpha                      | 1.2834  | 0.464115 |
| Von Willebrand factor homolog                              | 1.2834  | 0.557175 |

|                                                             |        |          |
|-------------------------------------------------------------|--------|----------|
| Bcl2-associated X protein                                   | 1.2894 | 0.42552  |
| Serine (or cysteine) peptidase inhibitor, clade B, member 2 | 1.2924 | 0.250784 |
| Kruppel-like factor 2 (lung)                                | 1.3472 | 0.265187 |
| Platelet derived growth factor, B polypeptide               | 1.4109 | 0.282982 |
| Fibronectin 1                                               | 1.434  | 0.32549  |
| Interleukin 1 receptor, type I                              | 1.4439 | 0.170929 |
| Baculoviral IAP repeat-containing 3                         | 1.4914 | 0.305429 |
| Serine (or cysteine) peptidase inhibitor, clade E, member 1 | 1.5192 | 0.39205  |
| Tenascin C                                                  | 1.6818 | 0.291151 |
| B-cell leukemia/lymphoma 2                                  | 2.639  | 0.016784 |

---

- 1 [Foot note: High dose cocoa powder group vs. Control group](#)

1 Supplementary Table 4. Primers used for Real time RT PCR

| Genes            | Primers (5' to 3')        |
|------------------|---------------------------|
| SREBP1-F         | CCGAGATGTGCGAACTGGA       |
| SREBP1-R         | GAAGTCACTGTCTTGGTTGTTGATG |
| chREBP -F        | CAGCATCGATCCGACACTCA      |
| chREBP -R        | ATCTTGTCCCGGCATAGCAAC     |
| PPAR $\gamma$ -F | GGAGCCTAAGTTTGAGTTTGCTGTG |
| PPAR $\gamma$ -R | TGCAGCAGGTTGTCTTGGATG     |
| LXR $\alpha$ -F  | CTGGAGACGTCACGGAGGTACA    |
| LXR $\alpha$ -R  | TGATGGCAATGAGCAGAGCA      |
| Perilipin2 -F    | GAGCTGGAGATGGAAGCAAAA     |
| Perilipin2 -R    | GTGATAAGCCCGAGAGCAGAG     |
| LPL-F            | GTCCCCTGGTCTGAAGCATT      |
| LPL-R            | TCCACATCTCCAAGTCCTCTCTC   |
| XDH-F            | ATCTGGAGACCCACTGCACC      |
| XDH-R            | TGTGCTCACGAAGAGCTCCAT     |
| Fabp4-F          | AGCGTAAATGGGGATTGGTC      |
| Fabp4-R          | GCTCTTCACCTTCCTGTCGTCT    |
| Hyou1-F          | TATCCAGCCTGTTTGGAGGTG     |
| Hyou1-R          | GCTCTGCAGGCTCATCCTTG      |
| ATF6-F           | AGTCCCAAGTCCAAAGCGAAGA    |
| ATF6-R           | CTGATTGGCAGGGCTCACACTA    |
| XBP1-F           | CAGCAAGTGGTGGATTTGGAAG    |
| XBP1-R           | TCTTAACTCCTGGTTCTCAACCAC  |
| TNF- $\alpha$ -F | TATGGCCCAGACCCTCACA       |
| TNF- $\alpha$ -R | GGAGTAGACAAGGTACAACCCATC  |
| MCP1-F           | AGCAGCAGGTGTCCCAAAGA      |
| MCP1-R           | GTGCTGAAGACCTTAGGGCAGA    |
| $\beta$ -actin-F | TGATCTCCTTCTGCATCCTGTC    |
| $\beta$ -actin-R | GCGGCATCCACGAAACTAC       |

2

3

**Figure S1.**

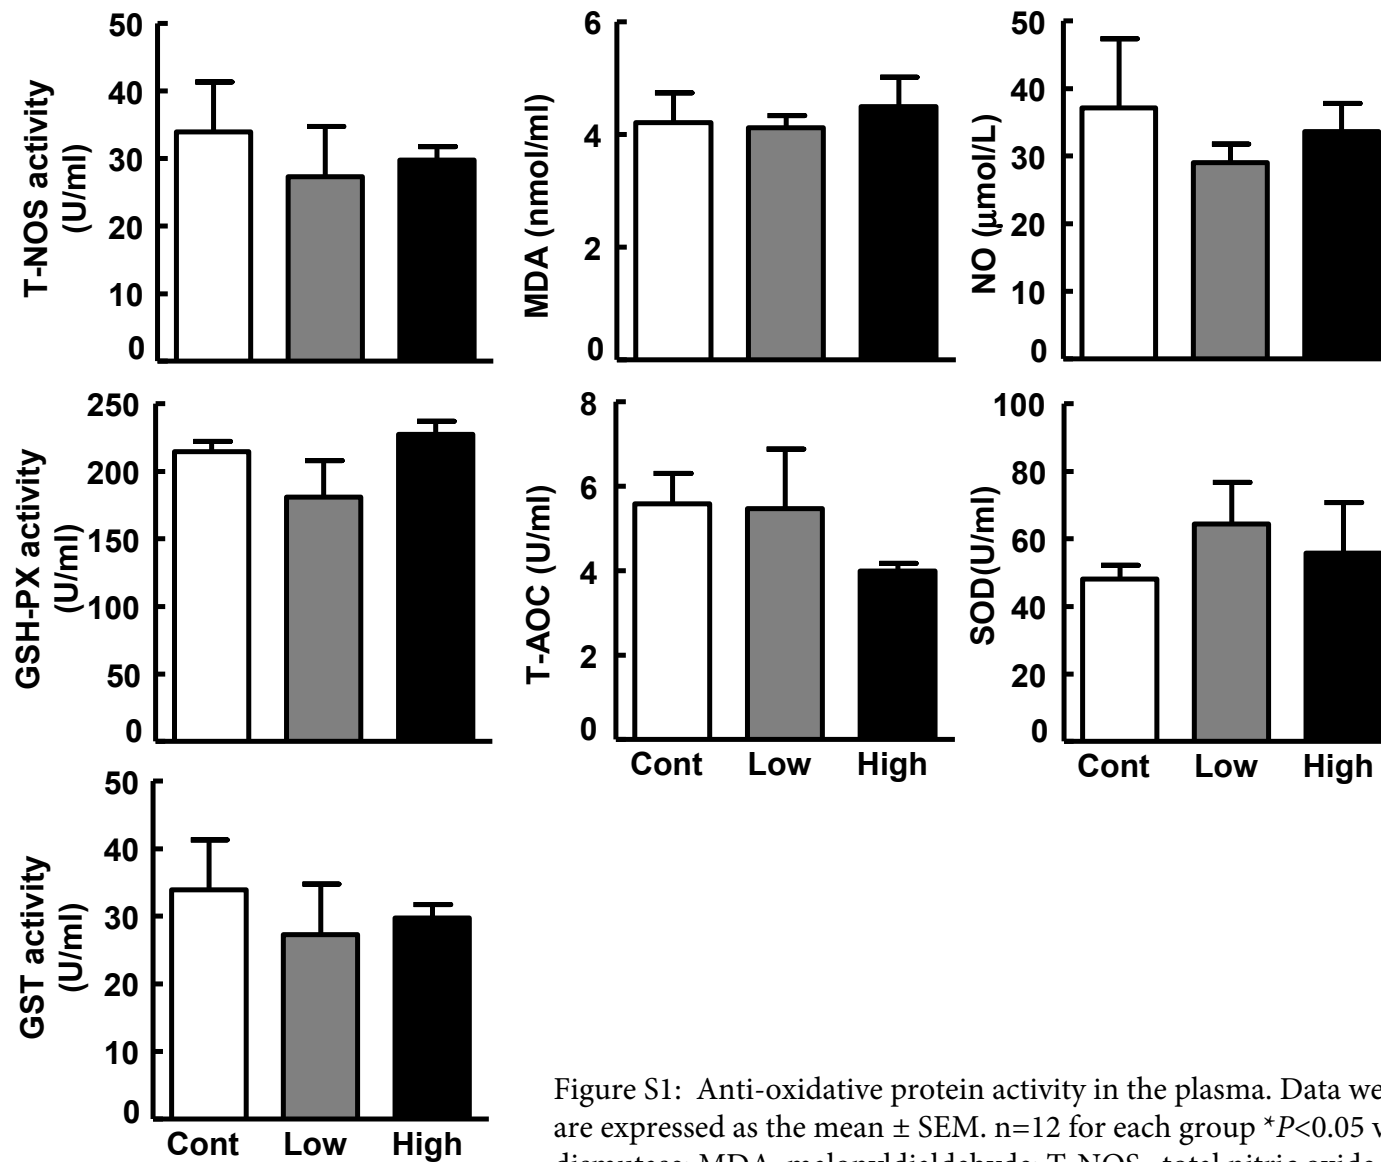

Figure S1: Anti-oxidative protein activity in the plasma. Data were analyzed with an ANOVA. Data are expressed as the mean  $\pm$  SEM.  $n=12$  for each group \* $P<0.05$  vs. control. SOD, Superoxidase dismutase; MDA, malonyldialdehyde; T-NOS, total nitric oxide synthase; GSH-PX, glutathione peroxidase; GSH-ST, glutathione s-transferase; T-AOC, total antioxidant capacity; XOD, xanthine oxidase; NO, nitric oxide.
